# Supplementary material
Source: PubMed Central journal article supplement (PMC6392430)
Supplement: NIHMS1013196-supplement-supplementary_Tables.pdf [file NIHMS1013196-supplement-supplementary_Tables.pdf]

**Supplementary Table S1 Dose administered among the 14 patients with cycle 1 day 17 Ki67 ≤ 10%**

| <b>Total dose of MK-2206</b> | <b>N (%)</b> | <b>Reason of dose interruption or dose reduction</b>                                                                                                        |
|------------------------------|--------------|-------------------------------------------------------------------------------------------------------------------------------------------------------------|
| 2400 mg                      | 8 (57.1%)    | Full dose of MK-2206                                                                                                                                        |
| 2250 mg                      | 2 (14.3%)    | Omitted one daily dose due to grade 3 rash                                                                                                                  |
| 2000 mg                      | 1 (7.1%)     | Omitted 1 daily dose for 2 consecutive cycles due to grade 1 diarrhea                                                                                       |
| 1700 mg                      | 1 (7.1%)     | Omitted 4 daily doses over 3 consecutive cycles due to grade 3 rash                                                                                         |
| 1650 mg                      | 1 (7.1%)     | Omitted doses on cycle 1 due to patient misunderstanding administration schedule and then omitted 1 daily dose for 2 consecutive cycles due to grade 3 rash |
| 950 mg                       | 1 (7.1%)     | Omitted doses on cycle 1 due to patient misunderstanding administration schedule and then discontinued treatment after cycle 2 due to grade 4 ALT and AST.  |

| <b>Supplementary Table S2. Surgical Procedures and Pathological Findings (n=13)</b> |           |
|-------------------------------------------------------------------------------------|-----------|
| Extent of Surgery                                                                   |           |
| Partial mastectomy + SLN biopsy                                                     | 4 (30.8%) |
| Partial mastectomy + ALND                                                           | 2 (15.4%) |
| Partial mastectomy + SLN + ALND                                                     | 2 (15.4%) |
| Mastectomy + SLN biopsy                                                             | 1 (7.7%)  |
| Mastectomy + ALND                                                                   | 2 (15.4%) |
| Mastectomy + SLN + ALND                                                             | 2 (15.4%) |
| Amount of residual tumor in the breast                                              |           |
| 0.1-2.0 cm                                                                          | 5 (38.5%) |
| > 2.0 cm                                                                            | 8 (61.5%) |
| Number of positive lymph nodes                                                      |           |
| 0                                                                                   | 6 (45.2%) |
| 1-3                                                                                 | 6 (45.2%) |
| 4-9                                                                                 | 0         |
| 10+                                                                                 | 1 (7.7%)  |
| SLN, Sentinel lymph node biopsy; ALND, Axillary lymph node dissection               |           |

Supplementary Fig. S1

Study Flow Chart

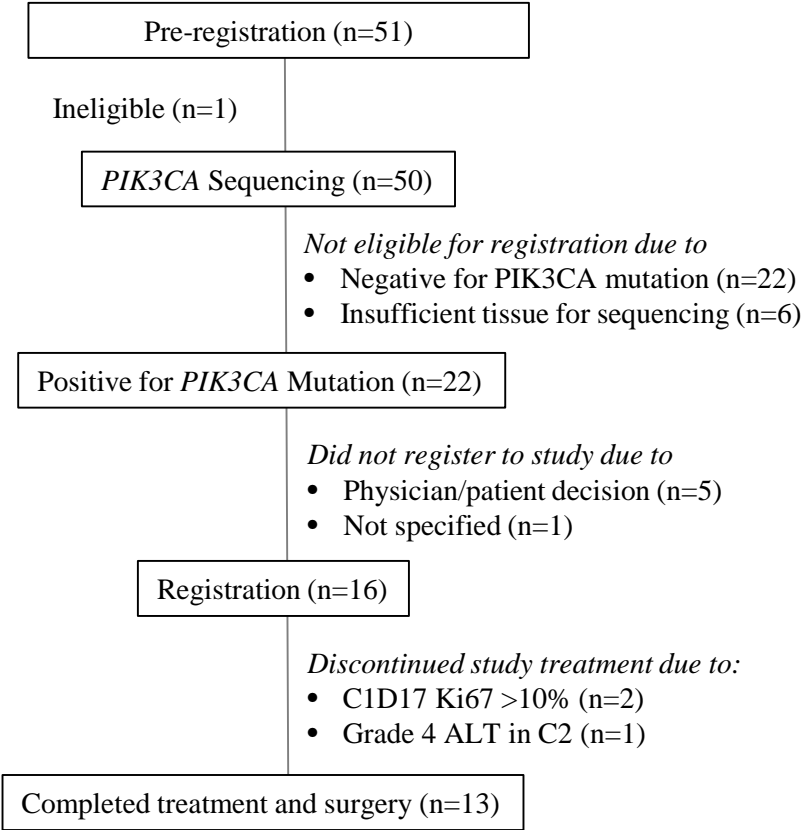

# Supplementary Fig S2

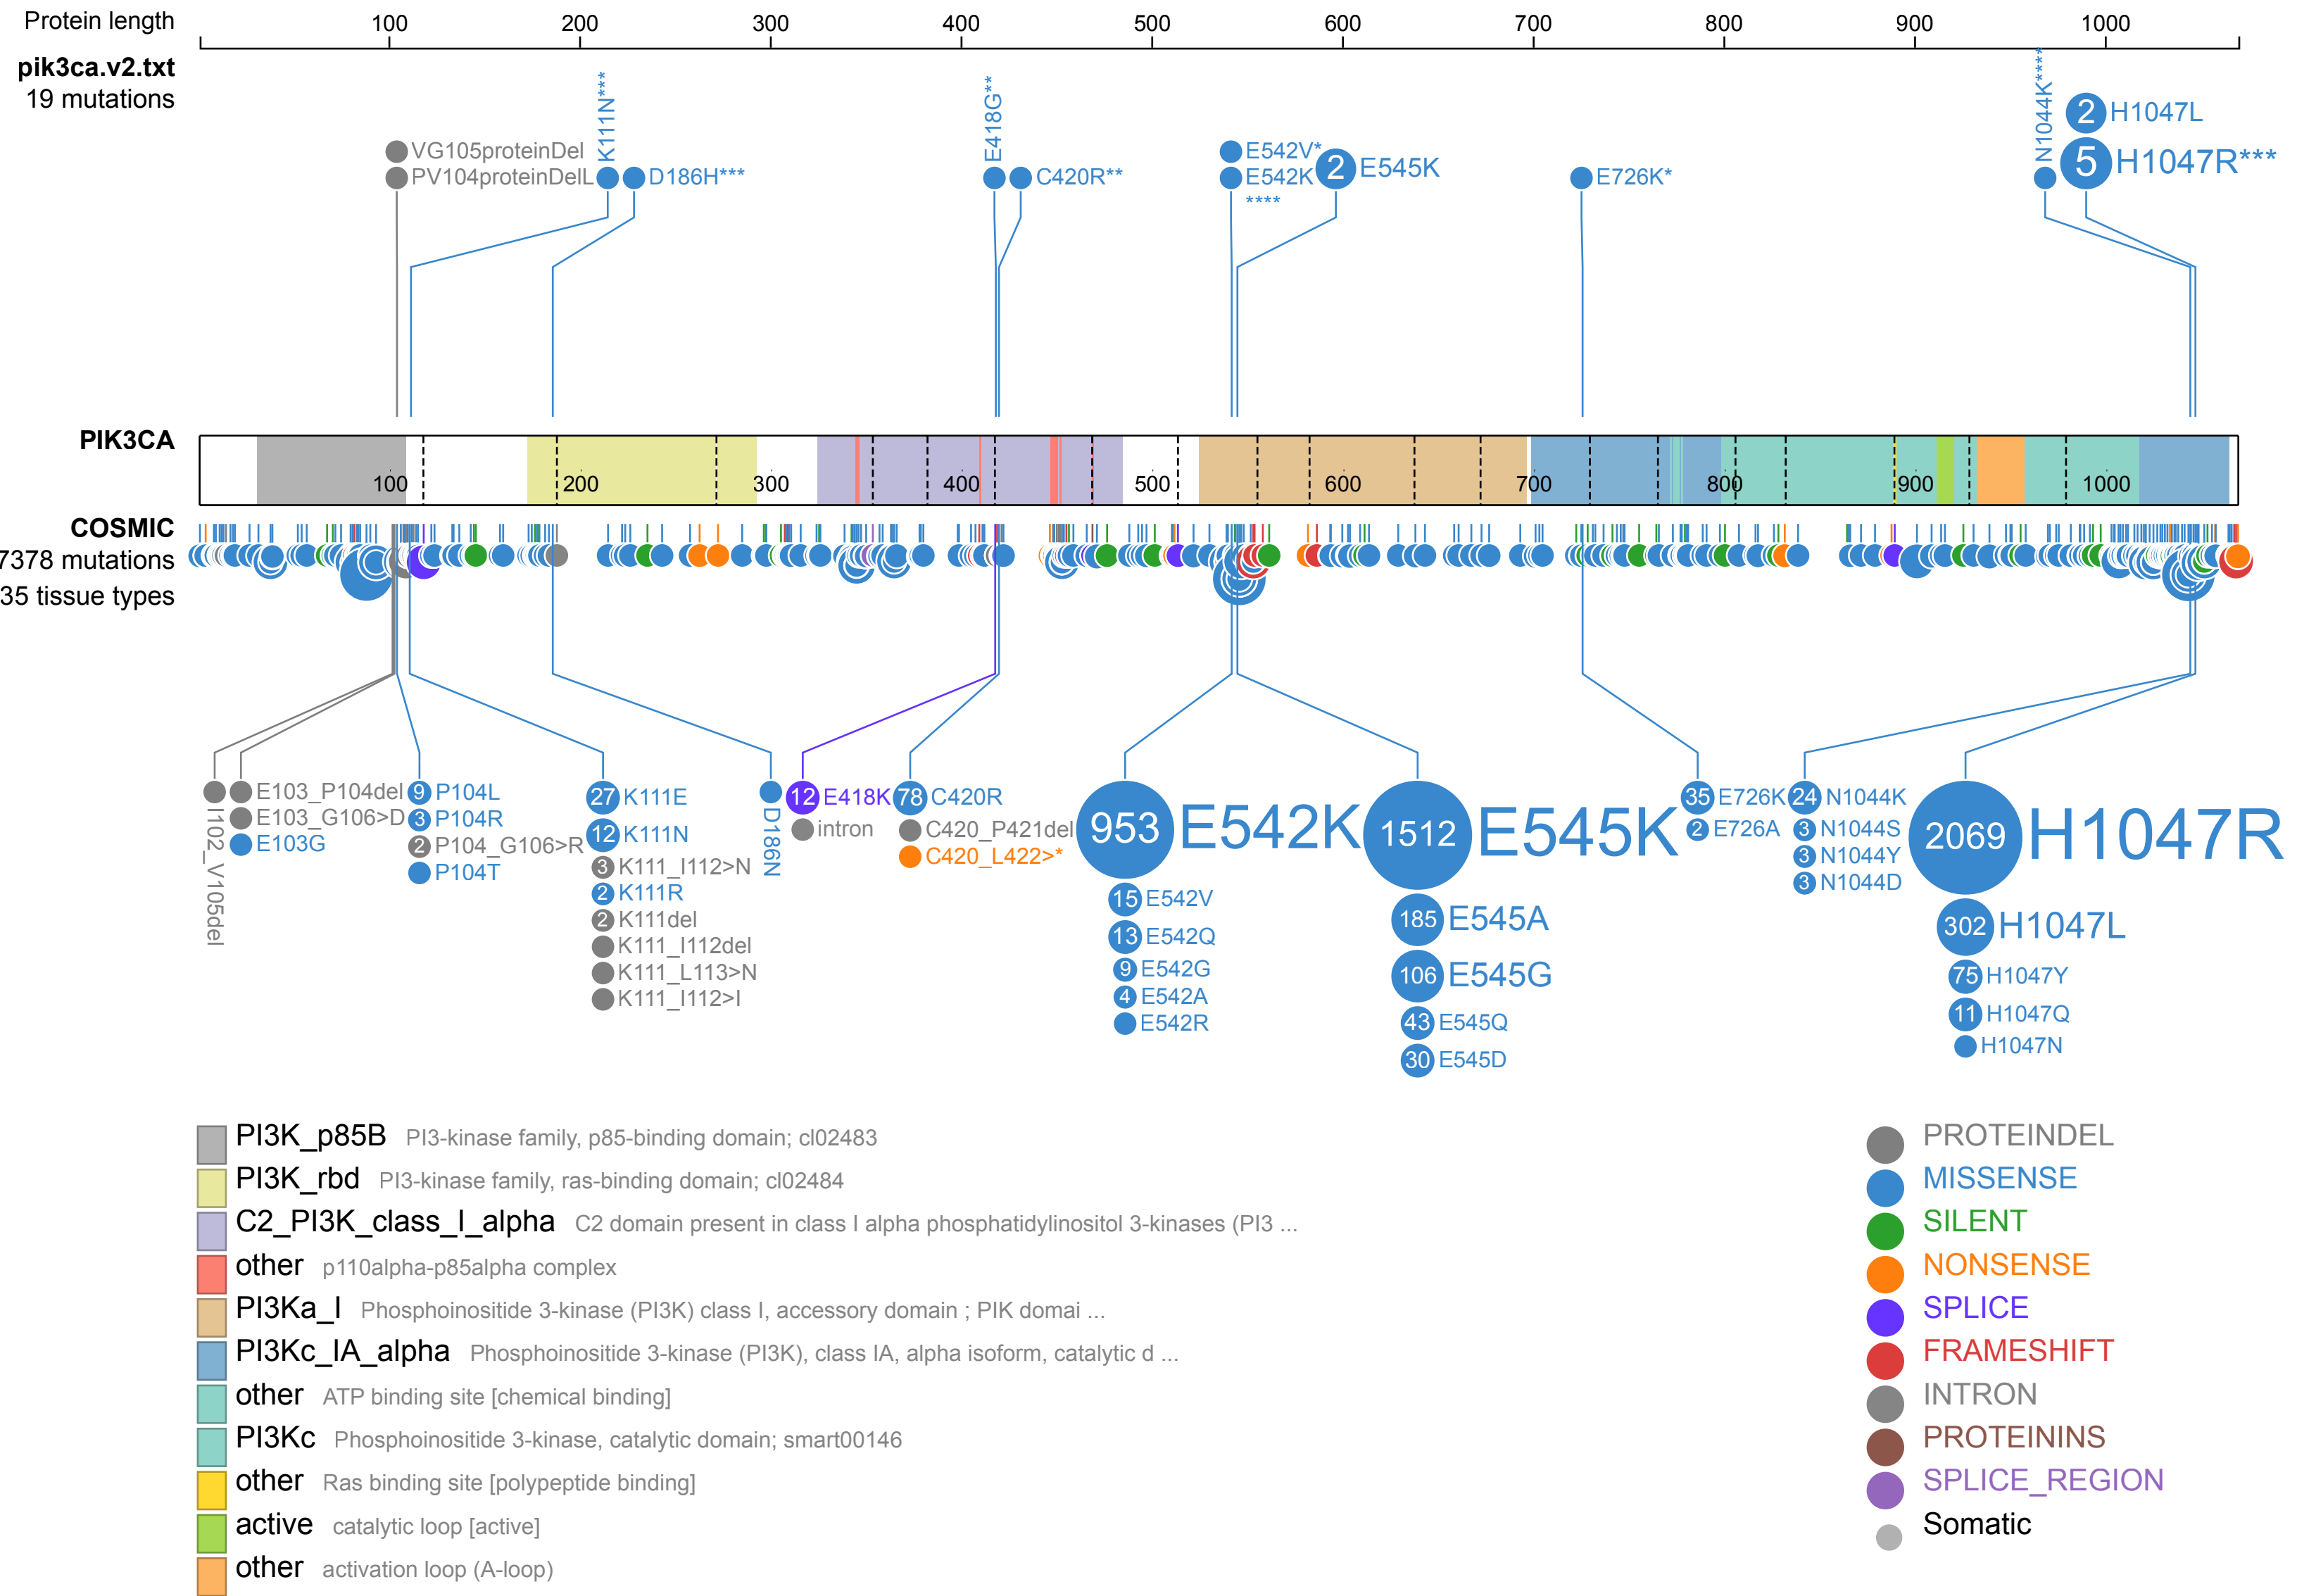

Cleaved PARP

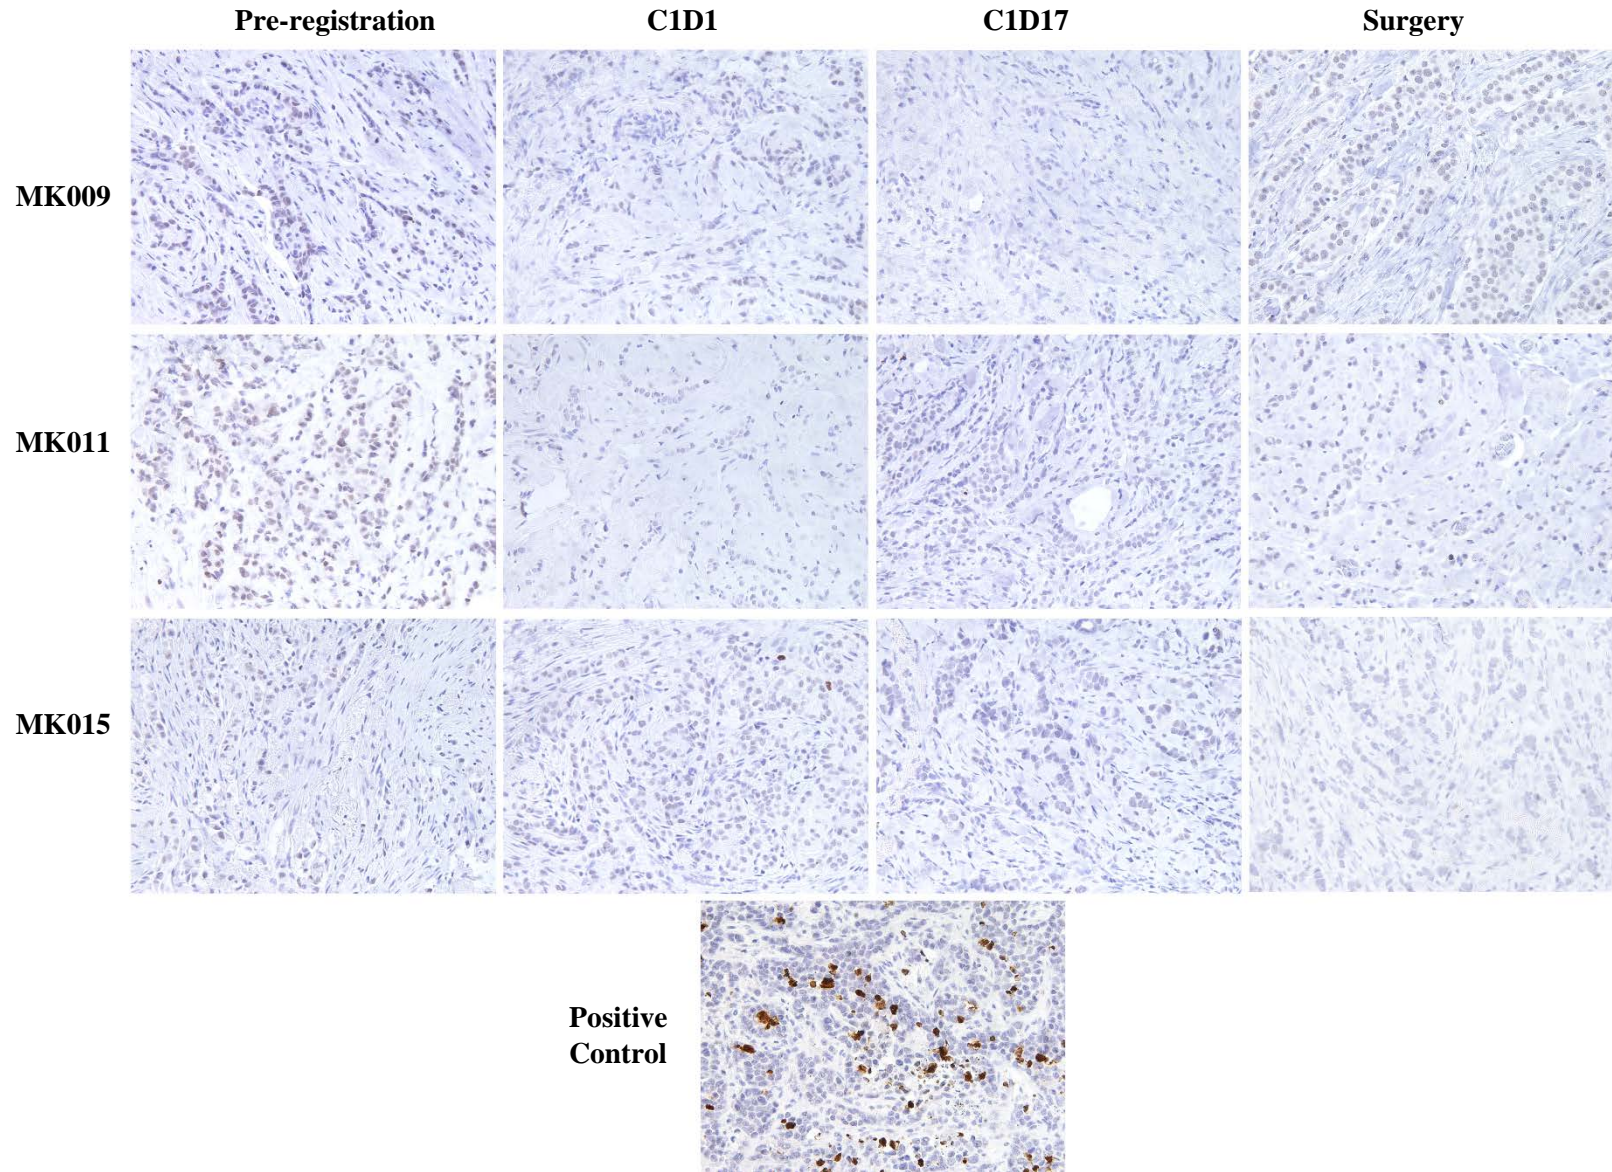

# Supplementary Fig. S4

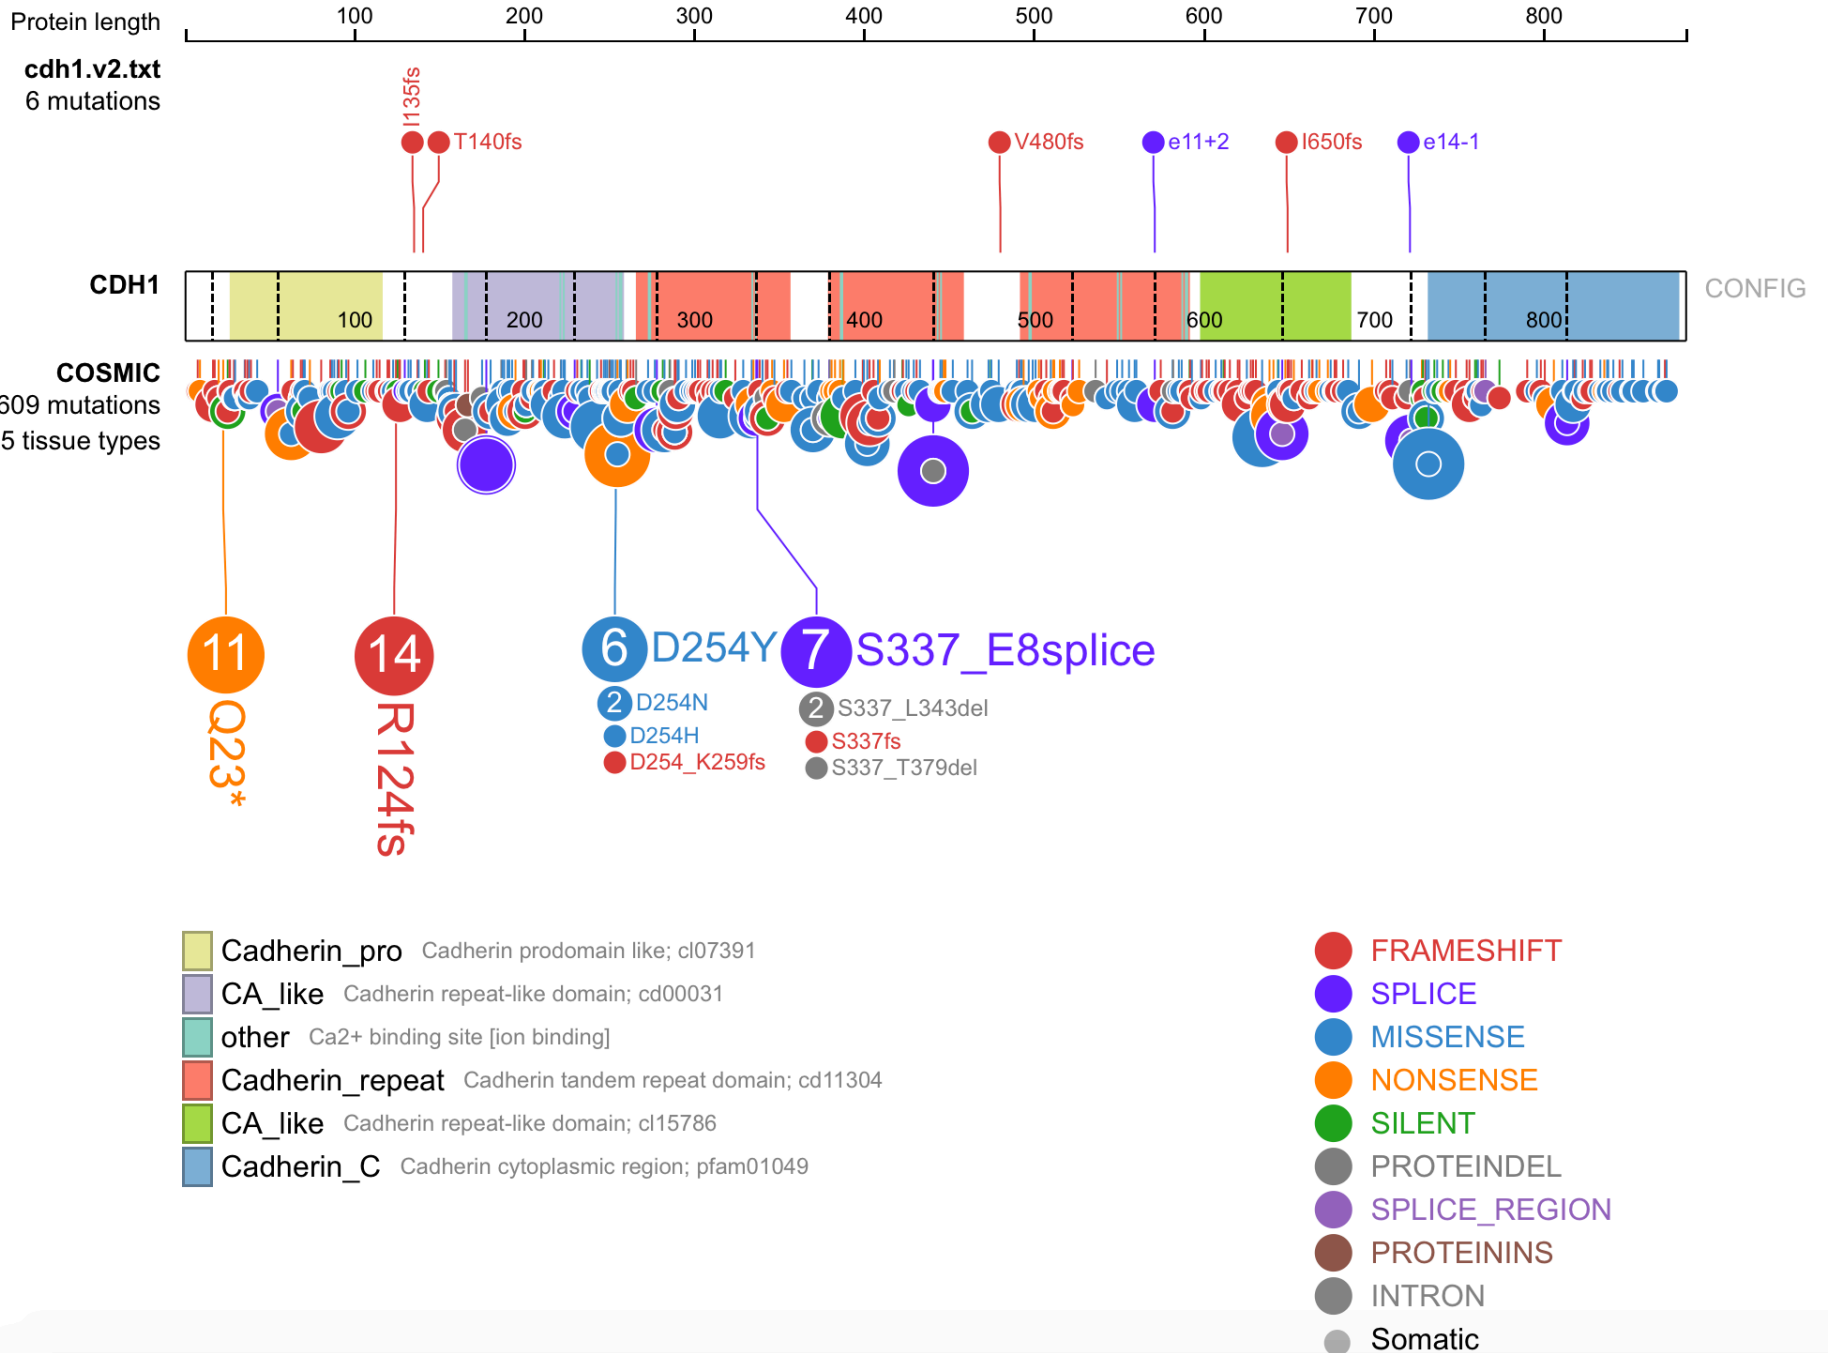



# Supplementary Fig. S5

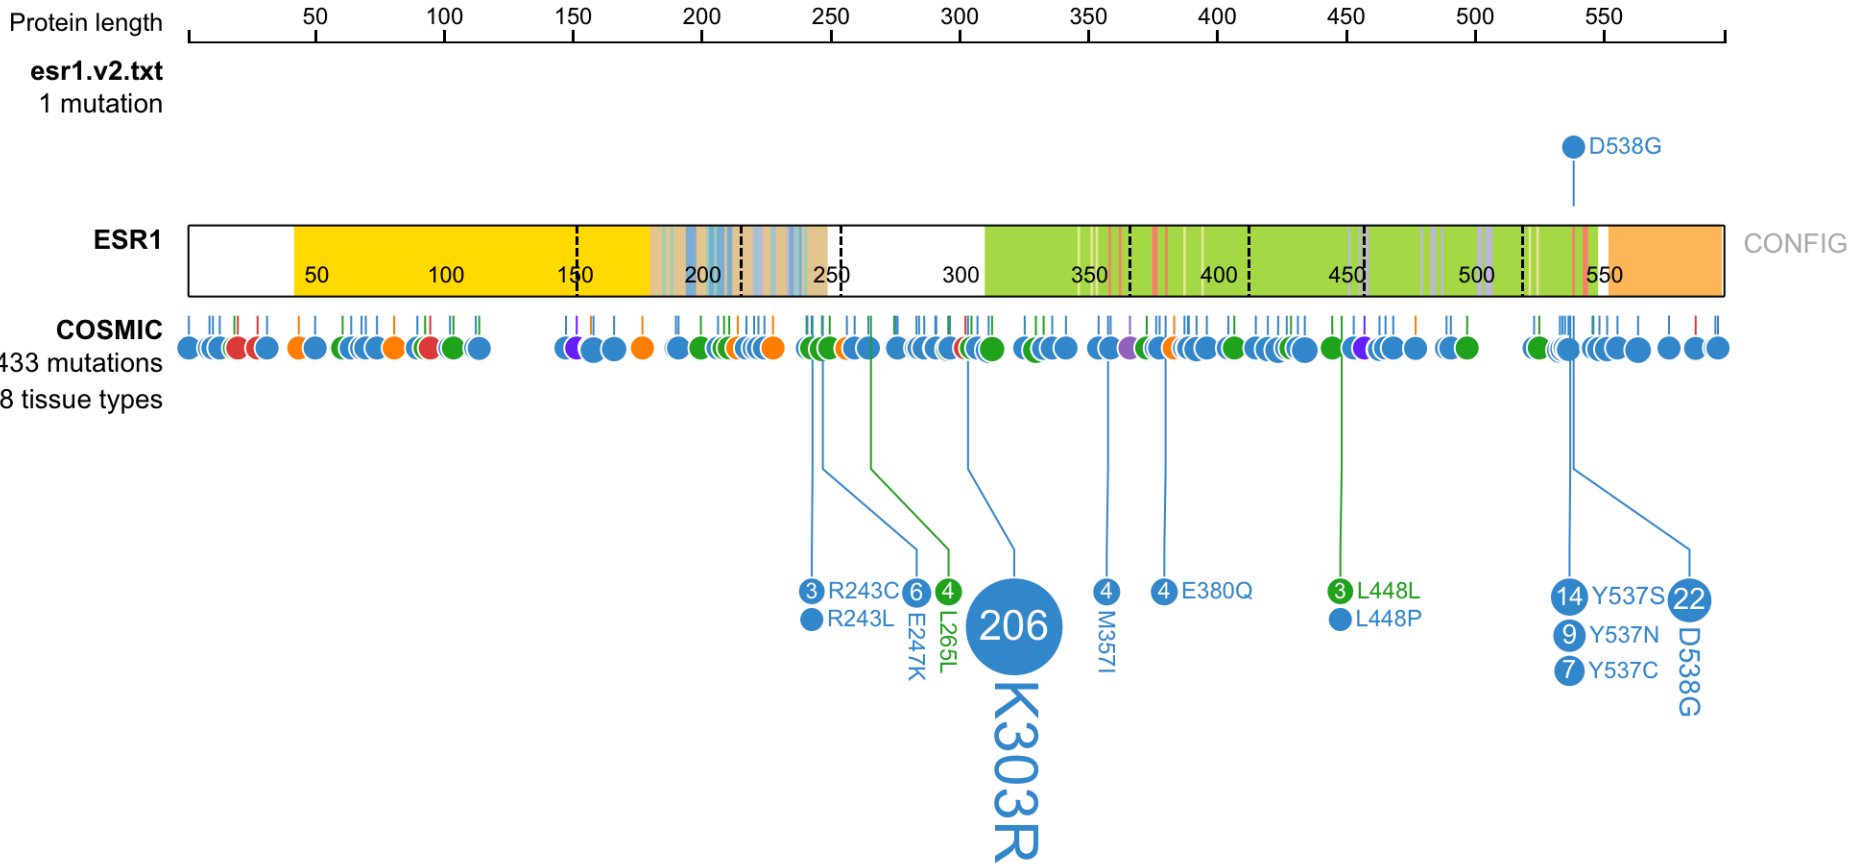

- Oest\_recep** Oestrogen receptor; pfam02159
- NR\_DBD\_ER** DNA-binding domain of estrogen receptors (ER) is composed of two C4-ty ...
- other** zinc binding site [ion binding]
- DNA binding** DNA binding site [nucleotide binding]
- other** dimer interface [polypeptide binding]
- NR\_LBD\_ER** Ligand binding domain of Estrogen receptor, which are activated by the ...
- other** ligand binding site [chemical binding]
- other** coactivator recognition site [polypeptide binding]
- ESR1\_C** Oestrogen-type nuclear receptor final C-terminal; pfam12743

- MISSENSE**
- NONSENSE**
- SILENT**
- FRAMESHIFT**
- SPLICE\_REGION**
- SPLICE**
- Somatic**
